# Supplementary material
Source: PubMed Central journal article supplement (PMC1458921)

**A**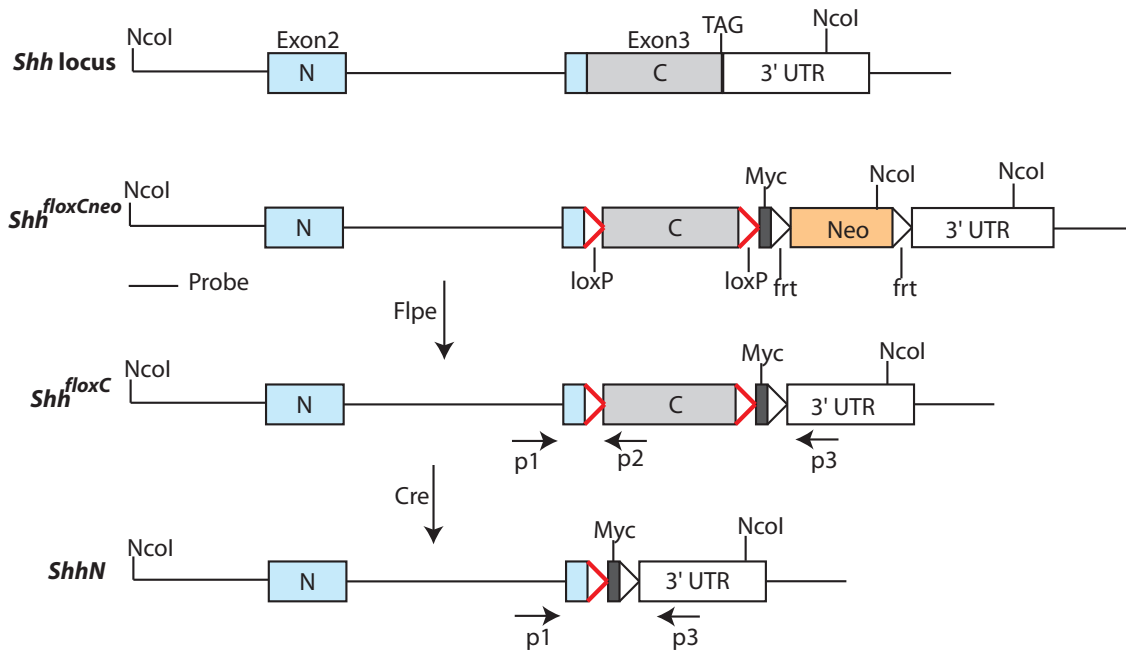**B**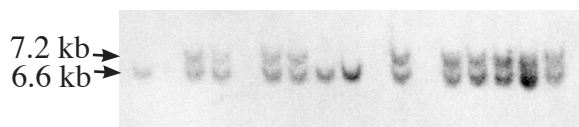**C**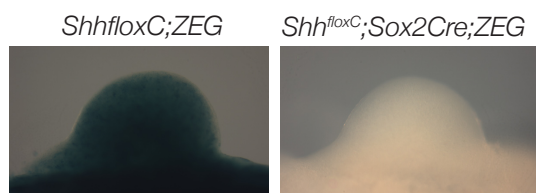**D**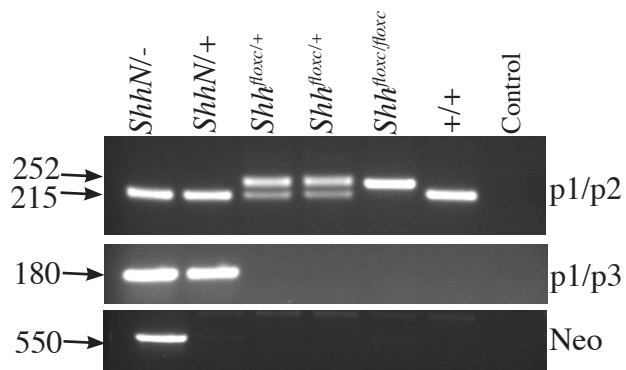

Supplement: pnas_0600124103_1.pdf [file pnas_0600124103_1.pdf]

forelimb

hindlimb

WT

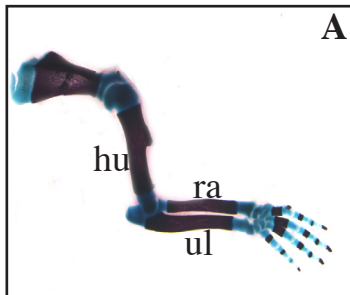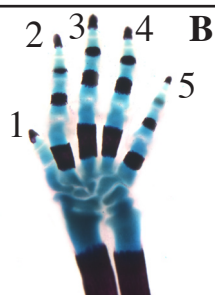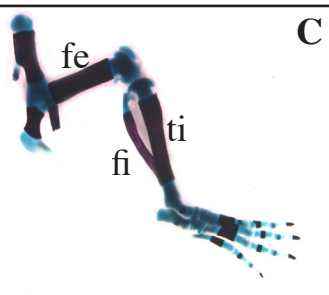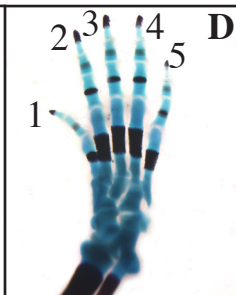

*Shh*<sup>flox/c/flox</sup>

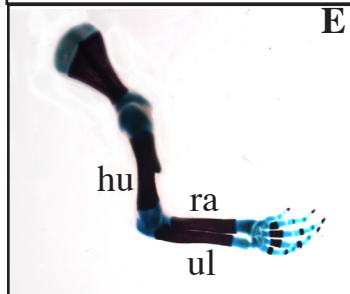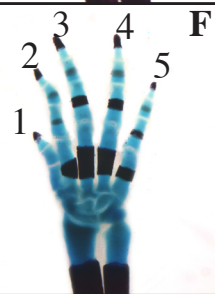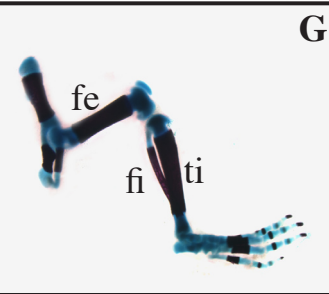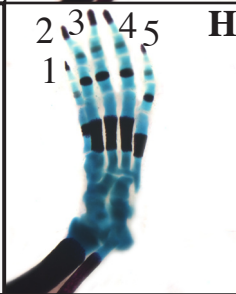

Supplement: pnas_0600124103_2.pdf [file pnas_0600124103_2.pdf]

*Ptch1**Gli1**Gre**Hoxd13**Fgf4*

WT

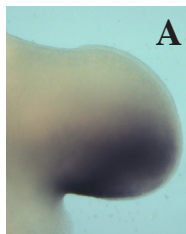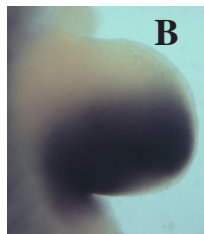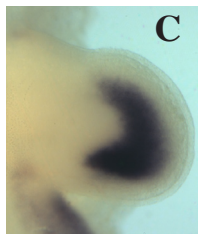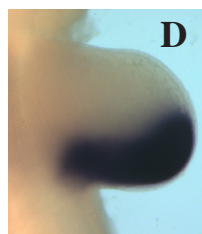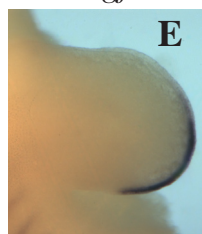*ShhN*<sup>-/-</sup>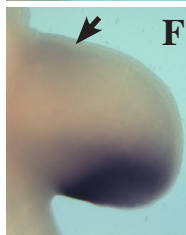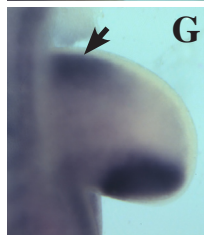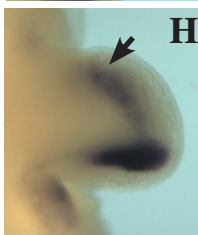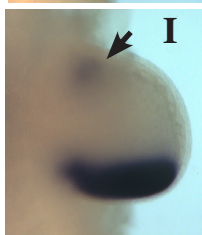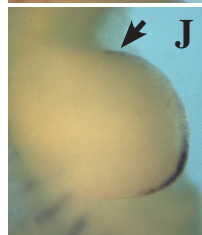*ShhN*<sup>+/+</sup>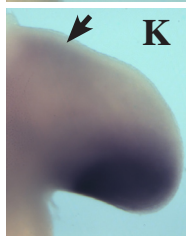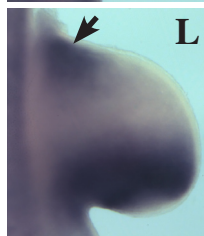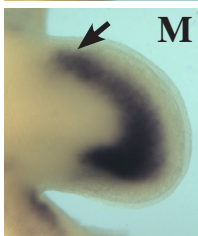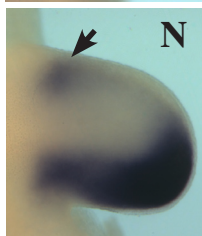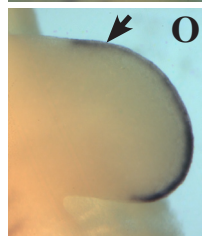

Supplement: pnas_0600124103_3.pdf [file pnas_0600124103_3.pdf]

WT

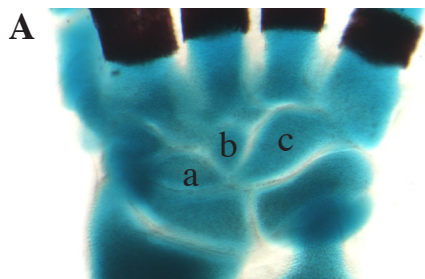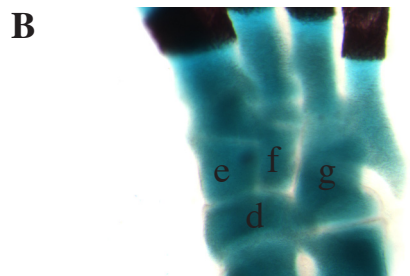

*ShhN*<sup>-/-</sup>

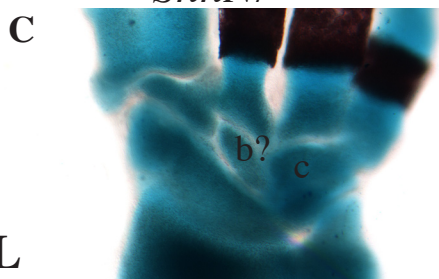

**FL**

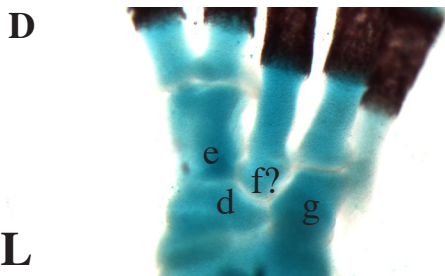

**HL**

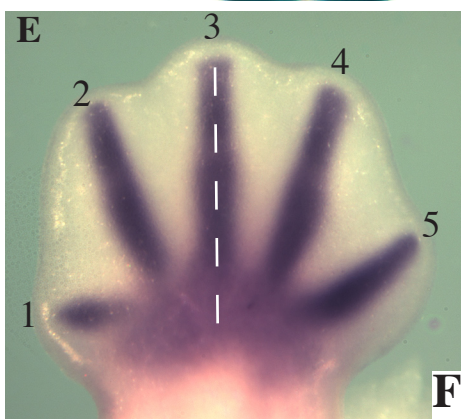

**FL**

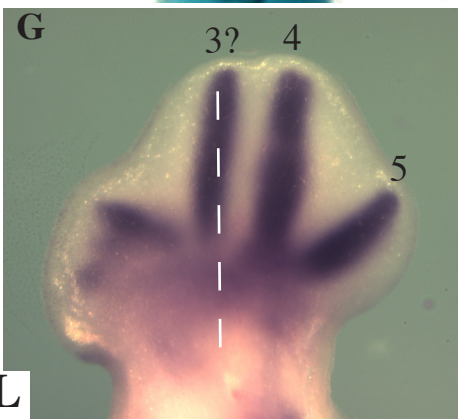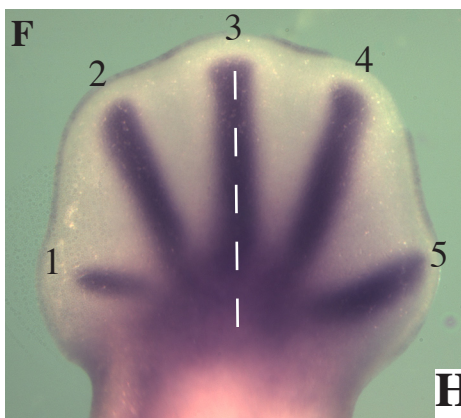

**HL**

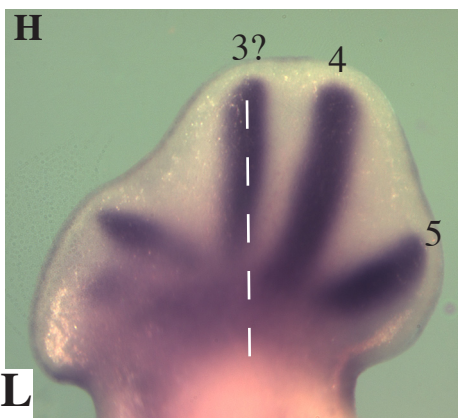

Supplement: pnas_0600124103_4.pdf [file pnas_0600124103_4.pdf]

*Ptch1*

*Gli1*

*Gre*

*Fgf4*

WT

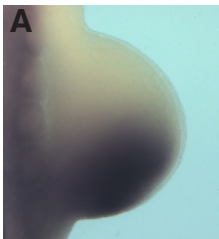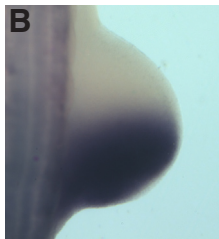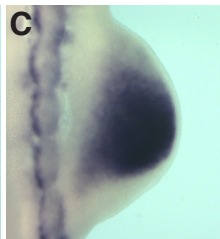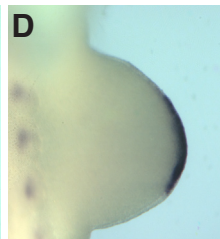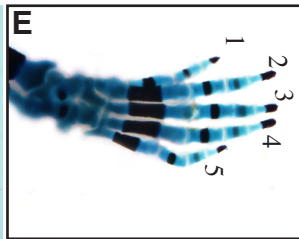

*ShhN*<sup>+/+</sup>;  
*mDispA*<sup>-/-</sup>

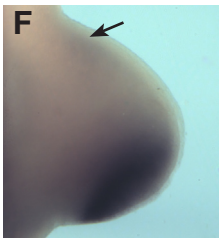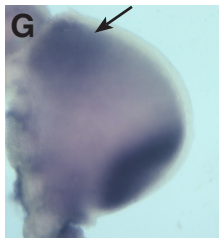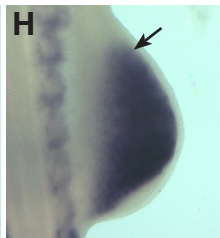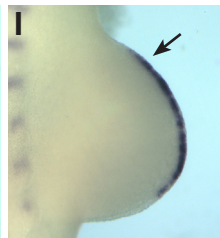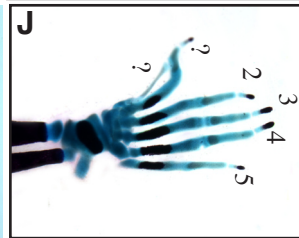

Supplement: pnas_0600124103_5.pdf [file pnas_0600124103_5.pdf]
